# Supplementary material
Source: Royal Society of Chemistry journal article supplement (doi:10.1039/d6tc00728g)
Supplement: d6tc00728g1.pdf [file d6tc00728g1.pdf]

## **Ce-Doping-Induced Burstein–Moss Shift in Biogenically Synthesized ZnO for Multifunctional Gas Sensing, Photocatalytic, and Antimicrobial Applications**

*Vishal S. Kamble<sup>1\*</sup>, Prajakta M. Mhatre<sup>2</sup>, Suresh T. Salunkhe<sup>3</sup>, Kaustubh A. Mundhe<sup>1</sup>,  
Satyajit S. Kamble<sup>2</sup>, Vinayak C. Lembarkar<sup>4</sup>, Asmita N. Bambole<sup>4</sup>, Suyog S. Mane<sup>4\*</sup>*

<sup>1</sup>Department of Chemistry, Changu Kana Thakur Arts, Commerce and Science College, New Panvel, (Empowered Autonomous), Mumbai-410206, India.

<sup>2</sup>Department of Physics, Changu Kana Thakur Arts, Commerce and Science College, New Panvel, (Empowered Autonomous), Mumbai-410206, India.

<sup>3</sup>Department of Chemistry, Yashavantrao Chavan Institute of Science, Constituent College of Karmveer Bhaurao Patil University, Satara-415001, Maharashtra, India.

<sup>4</sup>Department of Chemistry, Savitribai Phule Pune University, Ganeshkhind Road, Ganeshkhind, Pune, Maharashtra - 411007, India

### **\*Corresponding author:**

**Vishal S. Kamble** ([vishalchemistry1@gmail.com](mailto:vishalchemistry1@gmail.com))

Department of Chemistry, Changu Kana Thakur Arts, Commerce and Science College, New Panvel, (Autonomous), Mumbai-410206, India.

**Suyog S. Mane** ([suyog.mane@unipune.ac.in](mailto:suyog.mane@unipune.ac.in))

Department of Chemistry, Savitribai Phule Pune University, Ganeshkhind Rd, Ganeshkhind, Pune, Maharashtra - 411007, India

**Table 1. X-ray diffraction peak positions ( $2\theta$ ), corresponding Miller indices (hkl), and full width at half maximum (FWHM) values for pristine and Ce-doped ZnO samples.**

| Samples | Ce0@Zn                      |                        | Ce2@Zn                      |                        | Ce4@Zn                      |                        | Ce6@Zn                      |                        |
|---------|-----------------------------|------------------------|-----------------------------|------------------------|-----------------------------|------------------------|-----------------------------|------------------------|
|         | $2\theta$<br>( $^{\circ}$ ) | FWHM<br>( $^{\circ}$ ) |
|         | -                           | -                      | 25.49                       | 0.18333                | 25.48                       | 0.2745                 | 25.52                       | 0.2167                 |
| (100)   | 31.74                       | 0.20885                | 31.8                        | 0.26771                | 31.8                        | 0.2635                 | 31.8                        | 0.2393                 |
| (002)   | 34.42                       | 0.21808                | 34.48                       | 0.26487                | 34.46                       | 0.2428                 | 34.48                       | 0.2279                 |
| (101)   | 36.22                       | 0.22336                | 36.28                       | 0.28877                | 36.28                       | 0.2666                 | 36.34                       | 0.2568                 |
| (102)   | 47.5                        | 0.25888                | 47.6                        | 0.33816                | 47.56                       | 0.3203                 | 47.66                       | 0.2913                 |
| (110)   | 56.58                       | 0.30199                | 56.66                       | 0.17875                | 56.66                       | 0.1183                 | 56.7                        | 0.3215                 |
| (103)   | 62.84                       | 0.30011                | 62.88                       | 0.4085                 | 62.86                       | 0.3826                 | 62.9                        | 0.3182                 |
| (200)   | 66.32                       | 0.3856                 | 66.34                       | 0.47538                | 66.44                       | 0.4495                 | 66.46                       | 0.3354                 |
| (112)   | 67.96                       | 0.37327                | 67.95                       | 0.4284                 | 67.96                       | 0.4498                 | 68                          | 0.3849                 |
| (201)   | 69.09                       | 0.36831                | 69.14                       | 0.47462                | 69.16                       | 0.428                  | 69.1                        | 0.4318                 |

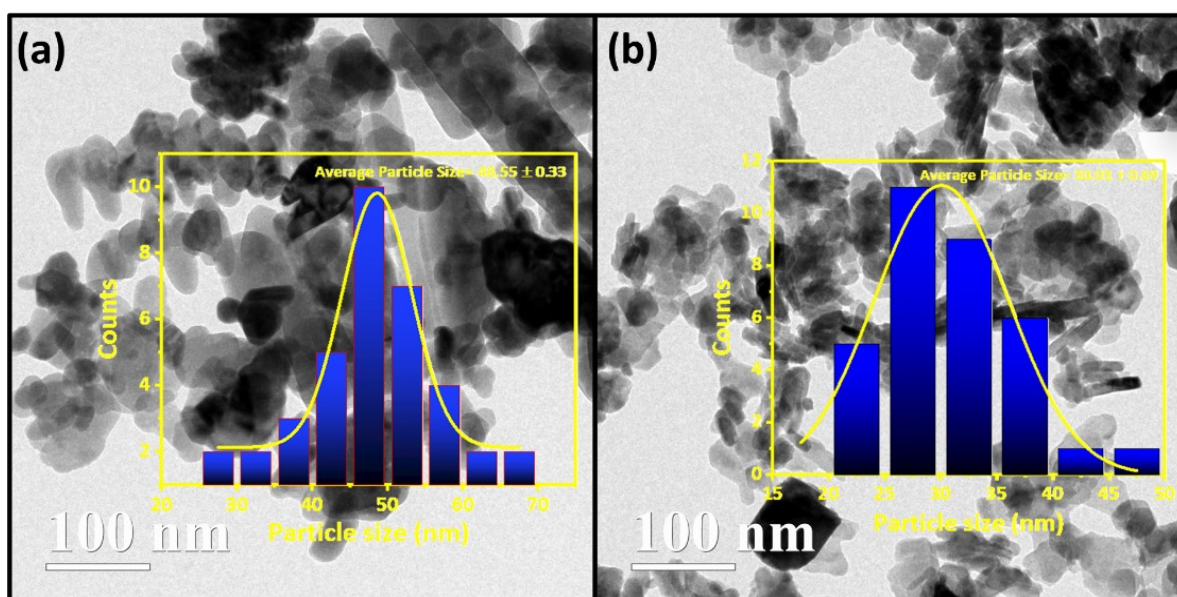

Figure S1. HRTEM images and corresponding particle size distribution histograms of (a) pristine ZnO and (b) Ce-doped ZnO (Ce-ZnO). The ZnO sample exhibits relatively larger and agglomerated nanoparticles with an average particle size of  $48.55 \pm 0.33$  nm, whereas Ce-ZnO shows reduced particle size ( $30.03 \pm 0.69$  nm) and improved dispersion, indicating that Ce incorporation effectively suppresses particle growth and promotes finer nanostructure formation.

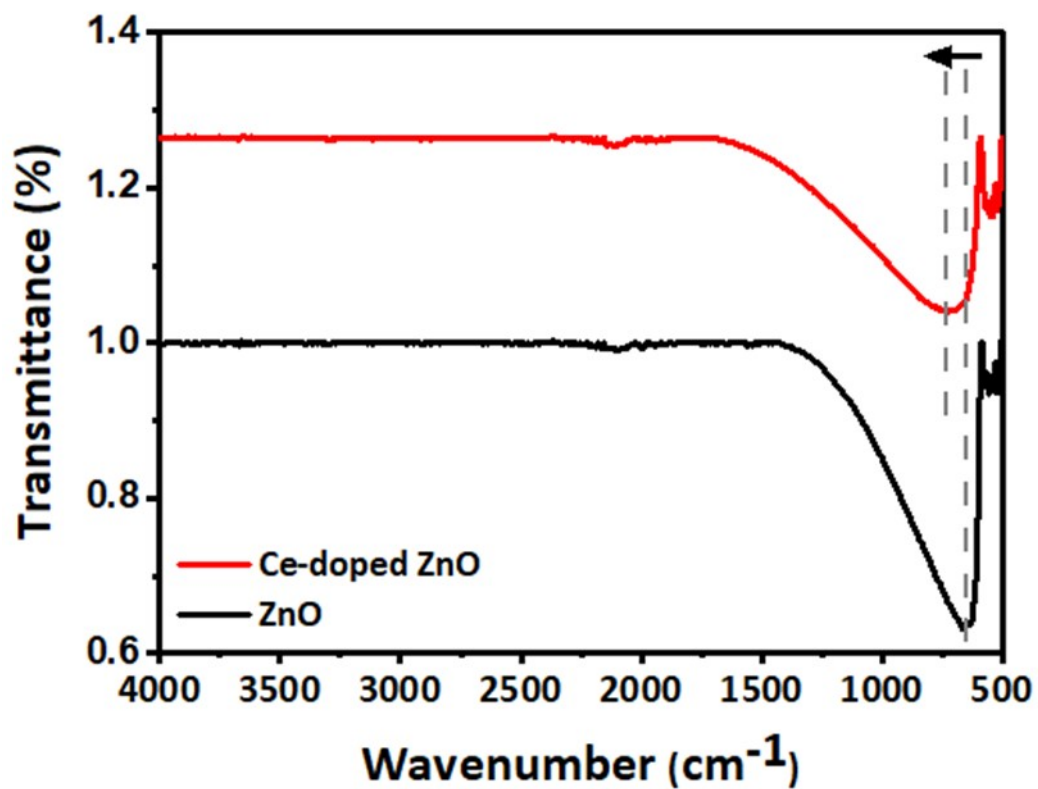

Figure S2. FTIR spectra of pristine ZnO and Ce-doped ZnO

**Table 2. Comparison of NO<sub>2</sub> gas sensing performance parameters of the present Ce-doped ZnO sensor with previously reported metal oxide-based NO<sub>2</sub> sensors.**

| Materials    | Preparation method                | Gas response | Conc. (ppm) | Working temp. (°C) | Gases                                                                                   | Selectivity     | Res./Reco. time (Sec.) | Lower detection limit (ppm) | Ref. No.         |
|--------------|-----------------------------------|--------------|-------------|--------------------|-----------------------------------------------------------------------------------------|-----------------|------------------------|-----------------------------|------------------|
| Ce doped ZnO | Hydrothermal                      |              | 100         | 250                | NO <sub>2</sub> , CO, H <sub>2</sub> , NH <sub>3</sub> , and acetone                    | NO <sub>2</sub> | 11.8 /53.6             | -                           | 6                |
| AlZnO        | Reflux method                     | 85 %         | 5           | 175                | Acetone, CO <sub>2</sub> , NH <sub>3</sub> , NO <sub>2</sub> , LPG                      | NO <sub>2</sub> | -                      | 5                           | 7                |
| Ni:ZnO       | Co-precipitation                  | 356%         | 100         | 200                | NO <sub>2</sub> , H <sub>2</sub> S, Cl <sub>2</sub> , SO <sub>2</sub>                   | NO <sub>2</sub> | 0.67/ 136.19           | 5                           | 8                |
| Ce:ZnO       | Co-precipitation (Green approach) | 7.5          | 20          | 190                | NO <sub>2</sub> , H <sub>2</sub> S, Cl <sub>2</sub> , SO <sub>2</sub> , CO <sub>2</sub> | NO <sub>2</sub> |                        | 1                           | <b>This work</b> |

**Table 3. Comparative summary of photocatalytic H<sub>2</sub> evolution performance of pristine ZnO and Ce-doped ZnO synthesized via different methods under various light sources and sacrificial agents.**

| Sr. No. | Catalyst  | Synthesis method       | Light source | Sacrificial agents                                | H <sub>2</sub> evolution rates | Ref.      |
|---------|-----------|------------------------|--------------|---------------------------------------------------|--------------------------------|-----------|
| 1       | ZnO       | One-pot Hydrothermal   | 300W         | Methanol                                          | 36 μmol/g.h                    | 34        |
|         | 5% Ce/ZnO | One-pot hydrothermal   | 300W         | Methanol                                          | 312 μmol/g.h                   |           |
| 2       | ZnO       | Mechanochemical method | 300W         | 10% methanol                                      | 1.2 μmol/g.h                   | 07        |
|         | 2% Ce/ZnO | Mechanochemical method | 300W         | 10% methanol                                      | 43 μmol/g.h                    |           |
| 3       | ZnO       | Combustion method      | 300W         | Na <sub>2</sub> S/Na <sub>2</sub> SO <sub>3</sub> | 0.36 mmol/g.h                  | 35        |
|         | 3%Ce/ZnO  | Combustion method      | 300W         | Na <sub>2</sub> S/Na <sub>2</sub> SO <sub>3</sub> | 2.57 mmol/g.h                  |           |
| 4       | ZnO       | Biological method      | 450W         | 10% methanol                                      | 1.09 μmol/g.h                  | This work |
|         | 2% Ce/ZnO | Biological method      | 450W         | 10% methanol                                      | 5.94 μmol/g.h                  |           |

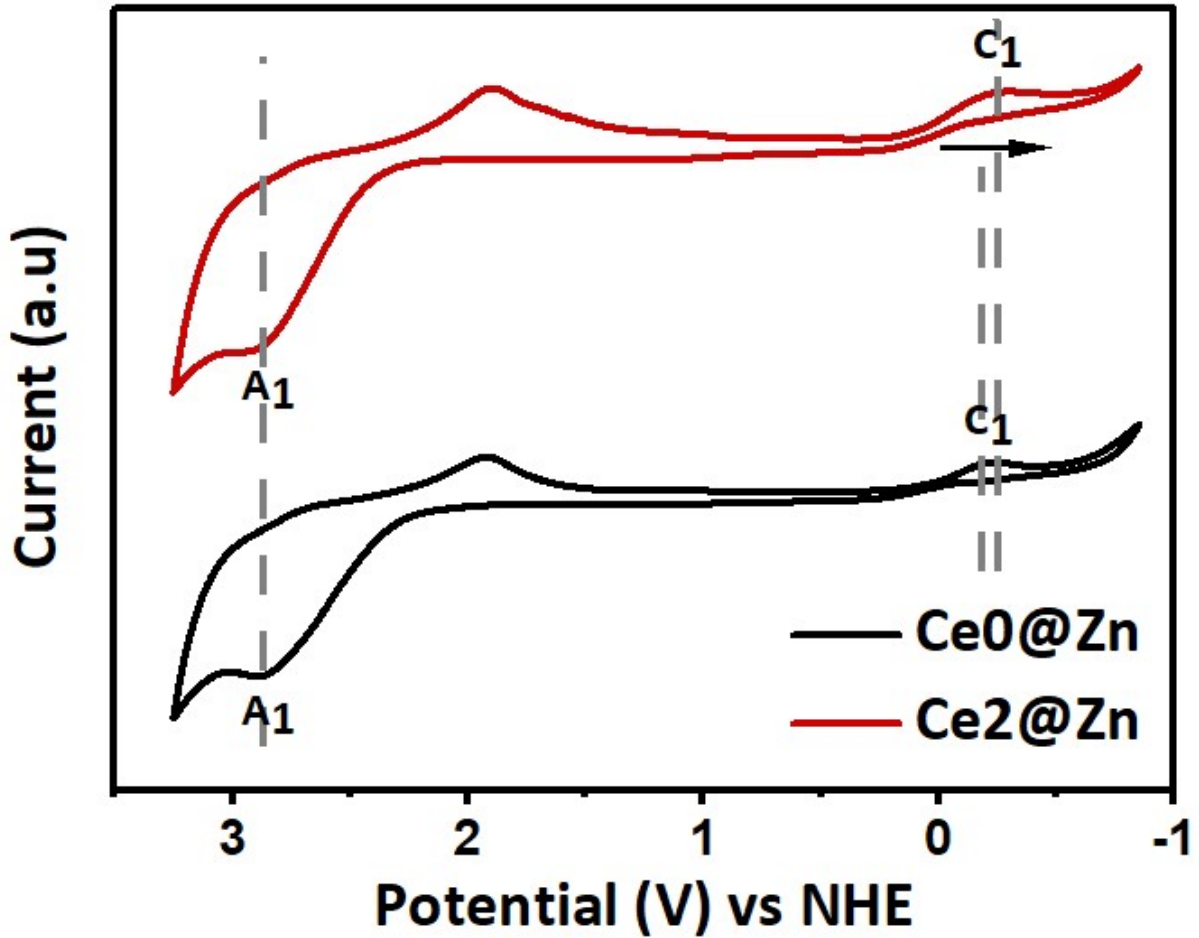

Figure S3. Cyclic voltammograms of Ce-doped ZnO samples ( $\text{Ce0@Zn}$  and  $\text{Ce2@Zn}$ ) recorded in a non-aqueous electrolyte versus NHE. The dashed lines indicate the onset potentials corresponding to the valence band maximum (VBM) and conduction band minimum (CBM). A noticeable shift in the band edge positions for  $\text{Ce2@Zn}$  compared to  $\text{Ce0@Zn}$  confirms the Burstein–Moss (BM) effect, arising from increased carrier concentration due to Ce doping, which leads to band filling and an apparent widening of the optical band gap.

**Table 3. Energy level positions and bandgap values of pristine ZnO and Ce-doped ZnO obtained from cyclic voltammetry (CV) and optical measurements.**

| Sample       | Cyclic Voltammetry |                 | Electrochemical bandgap (eV) | Optical bandgap (eV) |
|--------------|--------------------|-----------------|------------------------------|----------------------|
|              | LUMO vs. Vacuum    | HOMO vs. Vacuum |                              |                      |
| pristine ZnO | -4.32              | -7.39           | 3.07                         | 3.20                 |
| Ce-doped ZnO | -4.24              | -7.39           | 3.15                         | 3.23                 |

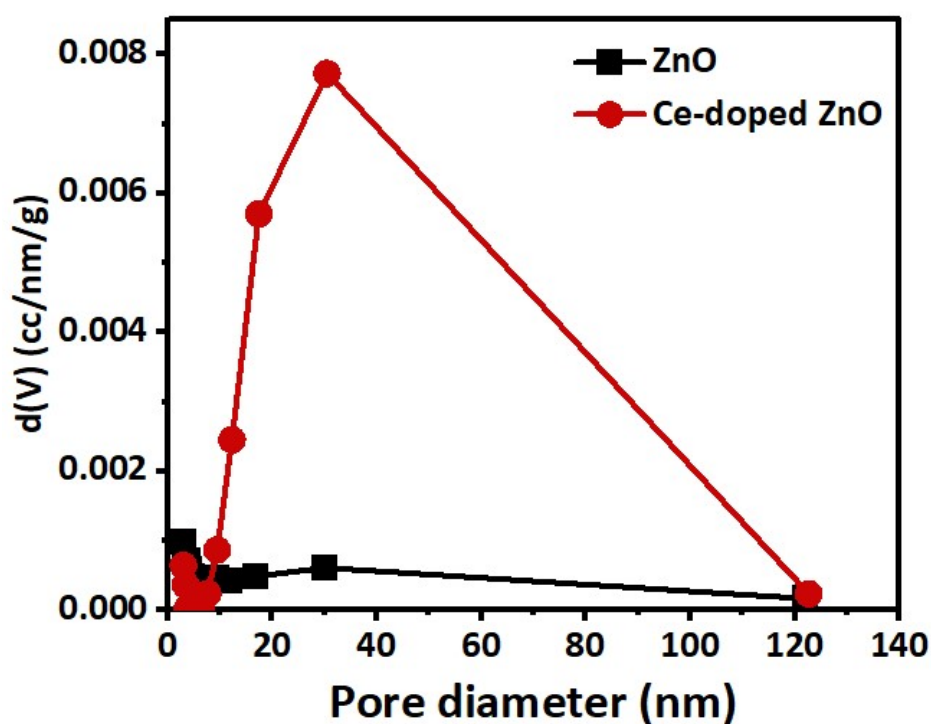

Figure S4. Pore size distribution curves of pristine ZnO and Ce-doped ZnO obtained from BET analysis of nitrogen adsorption–desorption isotherms.

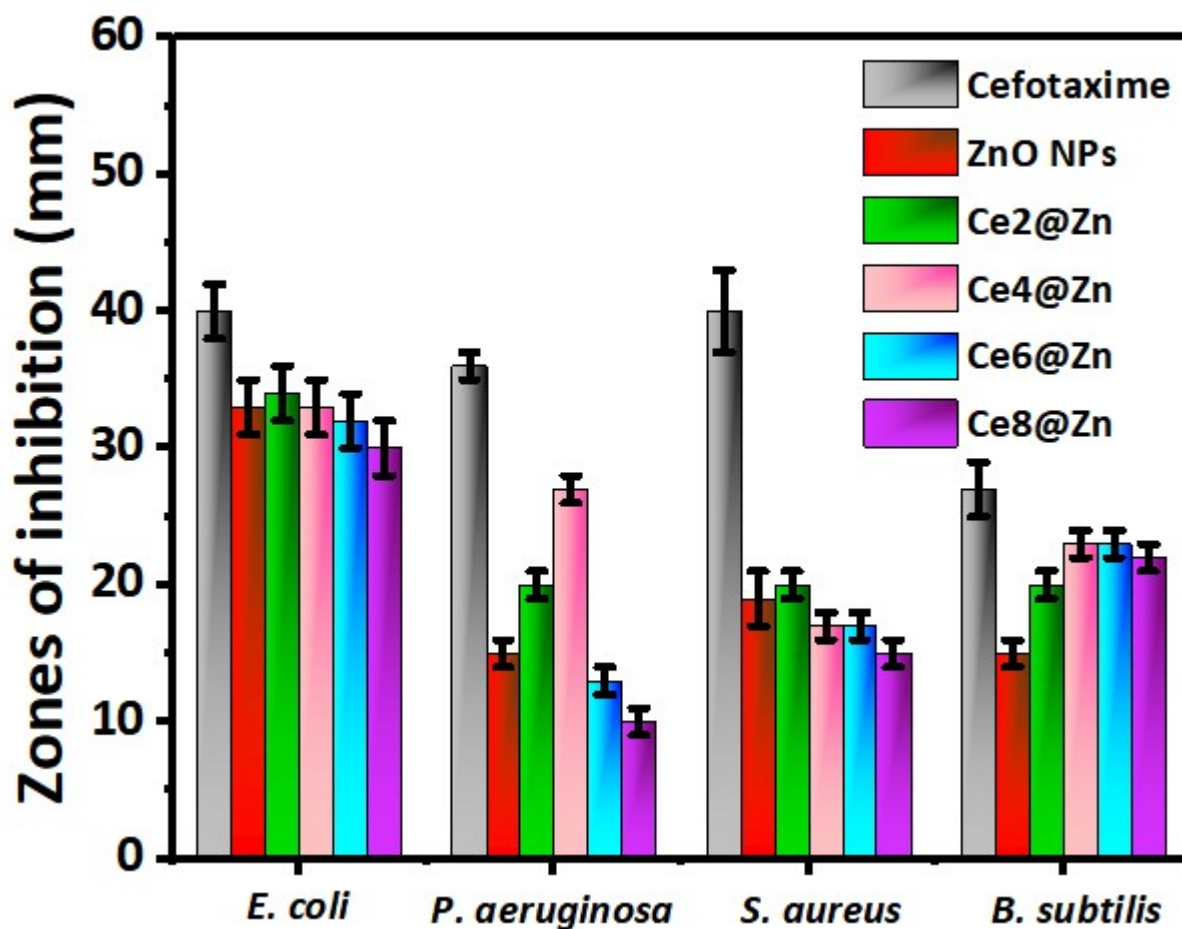

Figure S5. Comparative antibacterial activity of pristine ZnO and Ce-doped ZnO nanoparticles against different bacterial strains (*E. coli*, *P. aeruginosa*, *S. aureus*, and *B. subtilis*), expressed as zones of inhibition (mm). Cefotaxime is used as the positive control. The results show enhanced antibacterial performance for Ce-doped ZnO, with the 2% Ce-doped sample (Ce2@Zn) exhibiting superior activity compared to pristine ZnO and higher doping concentrations.
